# Supplementary material for: Major intensification of Atlantic overturning circulation at the onset of Paleogene greenhouse warmth
Source: PubMed Central journal article supplement (PMC6251870; doi:10.1038/s41467-018-07457-7), 2018-11-23
Supplement: 41467_2018_7457_MOESM1_ESM.pdf [file 41467_2018_7457_MOESM1_ESM.pdf]

## Major intensification of Atlantic overturning circulation at the onset of Paleogene greenhouse warmth

S. J. BATENBURG, S. VOIGT, O. FRIEDRICH, A.H. OSBORNE, A. BORNEMANN, T. KLEIN, L. PÉREZ-DÍAZ, M. FRANK

### Supplementary information

#### Supplementary Tables

**Supplementary Table 1.** Overview of ocean drilling sites used in this study

| program | Exp. | Site/<br>Hole | Ocean             | Region             | Latitude,<br>Longitude       | Water<br>depth (m)   | Paleo<br>depth (m)          | Age model <sup>a</sup>                                                                                                | Notes                                              |
|---------|------|---------------|-------------------|--------------------|------------------------------|----------------------|-----------------------------|-----------------------------------------------------------------------------------------------------------------------|----------------------------------------------------|
| DSDP    | 72   | 516F          | South<br>Atlantic | Rio Grande<br>Rise | 30°16.59'S<br>35°17.10'W     | 2109 <sup>1</sup>    | 500–<br>1000 <sup>1</sup>   | Shipboard <sup>1</sup> ;<br>Magnetostratigraphy <sup>2,3</sup>                                                        |                                                    |
| DSDP    | 74   | 525A          | South<br>Atlantic | Walvis<br>Ridge    | 29°04.24'S<br>02°59.12'E     | 2467 <sup>4</sup>    | ~1300 <sup>4,5</sup>        | Shipboard <sup>4</sup> ;<br>Magnetostratigraphy <sup>6,3</sup>                                                        | $\epsilon_{Nd}$ data 69.2–<br>72.0 Ma <sup>7</sup> |
| ODP     | 208  | 1267          | South<br>Atlantic | Walvis<br>Ridge    | 28°5.88'S<br>1°42.66'E       | 4355 <sup>8</sup>    | ~3000 <sup>8</sup>          | Precession cycles <sup>9</sup> ;<br>Magnetostratigraphy <sup>8,3</sup>                                                | Precession for<br>Paleocene only <sup>9</sup>      |
| DSDP    | 41   | 369           | North<br>Atlantic | Canary<br>Islands  | 26°35.5'N<br>14°59. 'W       | 1752 <sup>10</sup>   | 1500–<br>1700 <sup>8</sup>  | Shipboard <sup>10</sup>                                                                                               |                                                    |
| IODP    | 342  | U1403         | North<br>Atlantic | Newfound-<br>land  | 39°56.5997'N<br>51°48.1998'W | 4955.7 <sup>11</sup> | 4000–<br>4500 <sup>11</sup> | Calcareous<br>nannofossils <sup>12</sup><br>Cyclostratigraphy <sup>13</sup> ;<br>C-isotope stratigraphy <sup>13</sup> | Coordinates,<br>depth: Hole A                      |

<sup>a)</sup> The tie-points used for establishing age models are listed in Supplementary Table 7.

**Supplementary Table 2.** Nd isotope results for Site 516F

| Sample ID <sup>a</sup>                | Lab <sup>b</sup> | Site | Hole | Core | Sec. | from (cm) | to (cm) | Depth (mcd) | Age (Ma) <sup>c</sup> | <sup>143</sup> Nd/ <sup>144</sup> Nd | $\epsilon_{Nd(0)}$ <sup>d</sup> | $\epsilon_{Nd(t)}$ <sup>e</sup> | $2\sigma$ <sup>f</sup> |
|---------------------------------------|------------------|------|------|------|------|-----------|---------|-------------|-----------------------|--------------------------------------|---------------------------------|---------------------------------|------------------------|
| <i>leachates</i>                      |                  |      |      |      |      |           |         |             |                       |                                      |                                 |                                 |                        |
| 14                                    | K                | 516  | F    | 83   | 3    | 130       | 132     | 904.91      | 56.43                 | 0.5121558                            | -9.41                           | <b>-8.88</b>                    | 0.15                   |
| 09                                    | K                | 516  | F    | 84   | 3    | 90        | 92      | 914.01      | 57.24                 | 0.5121517                            | -9.49                           | <b>-8.96</b>                    | 0.07                   |
| 11                                    | K                | 516  | F    | 85   | 2    | 21        | 23      | 921.32      | 58.74                 | 0.5121629                            | -9.27                           | <b>-8.72</b>                    | 0.15                   |
| 04                                    | K                | 516  | F    | 86   | 4    | 34        | 35      | 933.95      | 59.34                 | 0.5121923                            | -8.69                           | <b>-8.15</b>                    | 0.07                   |
| 05                                    | K                | 516  | F    | 87   | 4    | 59        | 61      | 943.7       | 61.76                 | 0.5120942                            | -10.61                          | <b>-10.04</b>                   | 0.15                   |
| 24                                    | O                | 516  | F    | 88   | 2    | 92        | 94      | 950.53      | 63.68                 | 0.5120914                            | -10.66                          | <b>-10.07</b>                   | 0.13                   |
| 13                                    | K                | 516  | F    | 89   | 3    | 27        | 29      | 960.88      | 64.69                 | 0.5120655                            | -11.17                          | <b>-10.57</b>                   | 0.15                   |
| 22                                    | O                | 516  | F    | 90   | 3    | 44        | 46      | 970.55      | 66.35                 | 0.5120697                            | -11.09                          | <b>-10.47</b>                   | 0.13                   |
| 10                                    | K                | 516  | F    | 91   | 3    | 120       | 122     | 980.81      | 67.08                 | 0.5121035                            | -10.43                          | <b>-9.81</b>                    | 0.15                   |
| 08                                    | K                | 516  | F    | 92   | 2    | 20        | 22      | 987.81      | 67.58                 | 0.5121052                            | -10.39                          | <b>-9.77</b>                    | 0.15                   |
| 08b                                   | O                | 516  | F    | 92   | 2    | 20        | 22      | 987.81      | 67.51                 | 0.5121159                            | -10.18                          | <b>-9.56</b>                    | 0.20                   |
| 20                                    | O                | 516  | F    | 93   | 3    | 122       | 124     | 999.83      | 68.45                 | 0.5121132                            | -10.24                          | <b>-9.60</b>                    | 0.13                   |
| 20b                                   | O                | 516  | F    | 93   | 3    | 122       | 124     | 999.83      | 68.45                 | 0.5121221                            | -10.06                          | <b>-9.43</b>                    | 0.12                   |
| 03                                    | K                | 516  | F    | 94   | 3    | 126       | 128     | 1009.37     | 69.14                 | 0.5121107                            | -10.29                          | <b>-9.65</b>                    | 0.15                   |
| 15                                    | K                | 516  | F    | 95   | 4    | 18        | 20      | 1019.29     | 70.12                 | 0.5121276                            | -9.96                           | <b>-9.31</b>                    | 0.15                   |
| 15b                                   | O                | 516  | F    | 95   | 4    | 18        | 20      | 1019.29     | 70.07                 | 0.5121394                            | -9.73                           | <b>-9.08</b>                    | 0.20                   |
| 28                                    | O                | 516  | F    | 96   | 2    | 28        | 30      | 1025.39     | 70.75                 | 0.5121296                            | -9.92                           | <b>-9.26</b>                    | 0.13                   |
| 17                                    | K                | 516  | F    | 97   | 2    | 92        | 94      | 1032.03     | 71.45                 | 0.5121532                            | -9.46                           | <b>-8.80</b>                    | 0.15                   |
| 17b                                   | O                | 516  | F    | 97   | 2    | 92        | 94      | 1032.03     | 71.40                 | 0.5121423                            | -9.67                           | <b>-9.01</b>                    | 0.20                   |
| 07                                    | K                | 516  | F    | 98   | 3    | 110       | 112     | 1036.71     | 71.78                 | 0.5121286                            | -9.94                           | <b>-9.27</b>                    | 0.15                   |
| 18                                    | K                | 516  | F    | 99   | 1    | 29        | 31      | 1041.9      | 72.07                 | 0.5121324                            | -9.86                           | <b>-9.20</b>                    | 0.15                   |
| 12                                    | K                | 516  | F    | 100  | 2    | 110       | 112     | 1046.71     | 72.50                 | 0.5121225                            | -10.06                          | <b>-9.39</b>                    | 0.15                   |
| <i>Detrital fractions<sup>g</sup></i> |                  |      |      |      |      |           |         |             |                       |                                      |                                 |                                 |                        |
| 335                                   | O                | 516  | F    | 84   | 3    | 74        | 75      | 914.10      | 57.26                 | 0.5121320                            | -9.87                           | <b>-9.35</b>                    | 0.31                   |
|                                       |                  |      |      |      | 3    | 124       | 125     |             |                       |                                      |                                 |                                 |                        |
| 336                                   | O                | 516  | F    | 86   | 4    | 24        | 25      | 934.10      | 59.35                 | 0.5122149                            | -8.25                           | <b>-7.71</b>                    | 0.23                   |
|                                       |                  |      |      |      | 4    | 74        | 75      |             |                       |                                      |                                 |                                 |                        |
| 333                                   | O                | 516  | F    | 88   | 2    | 25        | 26      | 950.11      | 63.64                 | 0.5120742                            | -11.00                          | <b>-10.42</b>                   | 0.39                   |
|                                       |                  |      |      |      | 2    | 75        | 76      |             |                       |                                      |                                 |                                 |                        |
| 334                                   | O                | 516  | F    | 92   | 1    | 128       | 129     | 987.63      | 67.57                 | 0.5120367                            | -11.73                          | <b>-11.13</b>                   | 0.23                   |
|                                       |                  |      |      |      | 2    | 25        | 26      |             |                       |                                      |                                 |                                 |                        |
| 332                                   | O                | 516  | F    | 96   | 2    | 25        | 26      | 1025.61     | 70.78                 | 0.5120939                            | -10.61                          | <b>-9.98</b>                    | 0.23                   |
|                                       |                  |      |      |      | 2    | 75        | 76      |             |                       |                                      |                                 |                                 |                        |

a) Occurrences of "b" behind sample numbers indicate replicate measurements, averages are plotted.

b) The "K" stands for the geochemistry facilities of the GEOMAR in Kiel, Germany; "O" stands for the Department of Earth Sciences in Oxford, UK.

c) The tie-points used for establishing age models are listed in Supplementary Table 6.

d) Calculated as  $\epsilon_{Nd(0)}$ =

e) Calculated as  $\epsilon_{Nd(t)}$ , using a Sm/Nd ratio of 0.124 (ref. 19) and a current value of CHUR of 0.512638 (ref. 34)

f)  $2\sigma$  based on  $J_{Nd}$ , expressed as  $\epsilon_{Nd}$ .

g) each sample ID represent two samples that were combined to obtain sufficient material.

**Supplementary Table 3. Nd isotope results for Hole 525A**

| Sample ID <sup>a</sup> | Lab <sup>b</sup> | Site | Hole | Core | Sec. | from (cm) | to (cm) | Depth (mbsf) | Age (Ma) <sup>c</sup> | <sup>143</sup> Nd/ <sup>144</sup> Nd | $\epsilon_{Nd(0)}$ <sup>d</sup> | $\epsilon_{Nd(t)}$ <sup>e</sup> | $2\sigma$ <sup>f</sup> |
|------------------------|------------------|------|------|------|------|-----------|---------|--------------|-----------------------|--------------------------------------|---------------------------------|---------------------------------|------------------------|
| <i>leachates</i>       |                  |      |      |      |      |           |         |              |                       |                                      |                                 |                                 |                        |
| 13                     | K                | 525  | A    | 31   | 1    | 89        | 91      | 375.00       | 55.99                 | 0.5122055                            | -8.44                           | <b>-7.92</b>                    | 0.31                   |
| 14                     | K                | 525  | A    | 31   | 4    | 40        | 42      | 379.01       | 56.13                 | 0.5121828                            | -8.88                           | <b>-8.36</b>                    | 0.31                   |
| 12                     | K                | 525  | A    | 32   | 2    | 40        | 42      | 385.51       | 56.36                 | 0.5121794                            | -8.95                           | <b>-8.42</b>                    | 0.31                   |
| 1                      | K                | 525  | A    | 32   | 7    | 51        | 53      | 393.12       | 56.63                 | 0.5121760                            | -9.01                           | <b>-8.49</b>                    | 0.31                   |
| 5                      | K                | 525  | A    | 35   | 2    | 70        | 72      | 404.81       | 57.05                 | 0.5121955                            | -8.63                           | <b>-8.10</b>                    | 0.41                   |
| 4                      | K                | 525  | A    | 35   | 4    | 129       | 131     | 408.40       | 57.17                 | 0.5122014                            | -8.52                           | <b>-7.99</b>                    | 0.41                   |
| 2                      | K                | 525  | A    | 37   | 1    | 36        | 38      | 421.97       | 59.41                 | 0.5122931                            | -6.73                           | <b>-6.18</b>                    | 0.54                   |
| 8                      | K                | 525  | A    | 38   | 3    | 58        | 60      | 434.69       | 61.82                 | 0.5122163                            | -8.23                           | <b>-7.65</b>                    | 0.26                   |
| 11                     | K                | 525  | A    | 39   | 2    | 47        | 49      | 442.58       | 63.32                 | 0.5121830                            | -8.88                           | <b>-8.29</b>                    | 0.31                   |
| 10                     | K                | 525  | A    | 39   | 5    | 46        | 48      | 447.07       | 64.88                 | 0.5123288                            | -6.03                           | <b>-5.43</b>                    | 0.31                   |
| 22                     | K                | 525  | A    | 40   | 2    | 71        | 73      | 452.32       | 66.08                 | 0.5122363                            | -7.84                           | <b>-7.22</b>                    | 0.54                   |
| 6                      | K                | 525  | A    | 40   | 4    | 36        | 38      | 454.97       | 66.28                 | 0.5122807                            | -6.97                           | <b>-6.36</b>                    | 0.41                   |
| 7                      | K                | 525  | A    | 41   | 1    | 15        | 17      | 459.76       | 66.70                 | 0.5123508                            | -5.60                           | <b>-4.98</b>                    | 0.41                   |
| 23                     | K                | 525  | A    | 41   | 4    | 68        | 70      | 464.79       | 67.19                 | 0.5123205                            | -6.19                           | <b>-5.57</b>                    | 0.54                   |
| 3                      | K                | 525  | A    | 42   | 1    | 109       | 111     | 470.20       | 67.72                 | 0.5123062                            | -6.47                           | <b>-5.85</b>                    | 0.41                   |
| 20                     | K                | 525  | A    | 42   | 4    | 80        | 82      | 474.41       | 68.13                 | 0.5123252                            | -6.10                           | <b>-5.47</b>                    | 0.54                   |
| 24                     | K                | 525  | A    | 43   | 1    | 41        | 43      | 479.02       | 68.55                 | 0.5123169                            | -6.26                           | <b>-5.63</b>                    | 0.41                   |
| 19                     | K                | 525  | A    | 43   | 4    | 55        | 57      | 483.66       | 68.87                 | 0.5122948                            | -6.69                           | <b>-6.06</b>                    | 0.54                   |

<sup>a-f</sup> Footnotes as for Table 2.

**Supplementary Table 4.** Nd isotope results for Site 1267

| Sample ID <sup>a</sup>    | Lab <sup>b</sup> | Site | Hole | Core | Sec. | from (cm) | to (cm) | Depth (CCSF-A) | Age (Ma) <sup>c</sup> | <sup>143</sup> Nd/ <sup>144</sup> Nd | $\epsilon_{Nd(0)}$ <sup>d</sup> | $\epsilon_{Nd(t)}$ <sup>e</sup> | $2\sigma$ <sup>f</sup> |
|---------------------------|------------------|------|------|------|------|-----------|---------|----------------|-----------------------|--------------------------------------|---------------------------------|---------------------------------|------------------------|
| <i>leachates</i>          |                  |      |      |      |      |           |         |                |                       |                                      |                                 |                                 |                        |
| 72                        | K                | 1267 | B    | 23   | 4    | 15        | 17      | 232.41         | 56.08                 | 0.5121009                            | -10.48                          | <b>-9.96</b>                    | 0.42                   |
| 94                        | K                | 1267 | A    | 23   | 3    | 85        | 87      | 237.36         | 56.42                 | 0.5122368                            | -7.83                           | <b>-7.30</b>                    | 0.42                   |
| 89                        | K                | 1267 | B    | 24   | 2    | 88        | 90      | 242.34         | 56.69                 | 0.5121505                            | -9.51                           | <b>-8.99</b>                    | 0.26                   |
| 90                        | K                | 1267 | B    | 24   | 5    | 131       | 133     | 247.27         | 57.01                 | 0.5121974                            | -8.59                           | <b>-8.07</b>                    | 0.26                   |
| 75                        | K                | 1267 | B    | 25   | 1    | 43        | 45      | 252.25         | 57.34                 | 0.5121350                            | -9.81                           | <b>-9.28</b>                    | 0.42                   |
| 77                        | K                | 1267 | B    | 25   | 4    | 89        | 91      | 257.21         | 57.64                 | 0.5121368                            | -9.78                           | <b>-9.24</b>                    | 0.42                   |
| 91                        | K                | 1267 | A    | 25   | 4    | 6         | 8       | 262.17         | 57.94                 | 0.5122271                            | -8.01                           | <b>-7.48</b>                    | 0.26                   |
| 70                        | K                | 1267 | A    | 26   | 1    | 36        | 38      | 267.07         | 58.23                 | 0.5122038                            | -8.47                           | <b>-7.93</b>                    | 0.41                   |
| 71                        | K                | 1267 | A    | 26   | 4    | 86        | 88      | 272.07         | 58.66                 | 0.5121706                            | -9.12                           | <b>-8.57</b>                    | 0.42                   |
| 84                        | K                | 1267 | B    | 27   | 5    | 139       | 141     | 277.05         | 59.19                 | 0.5122532                            | -7.51                           | <b>-6.96</b>                    | 0.26                   |
| 121                       | K                | 1267 | B    | 28   | 2    | 141       | 143     | 282.02         | 59.85                 | 0.5122049                            | -8.45                           | <b>-7.89</b>                    | 0.42                   |
| 88                        | K                | 1267 | B    | 28   | 6    | 37        | 39      | 286.98         | 60.51                 | 0.5121909                            | -8.72                           | <b>-8.16</b>                    | 0.26                   |
| 81                        | K                | 1267 | B    | 29   | 3    | 47        | 49      | 291.93         | 61.16                 | 0.5122020                            | -8.51                           | <b>-7.94</b>                    | 0.42                   |
| 82                        | K                | 1267 | A    | 29   | 1    | 20        | 22      | 296.91         | 61.82                 | 0.5121558                            | -9.41                           | <b>-8.83</b>                    | 0.26                   |
| 87                        | K                | 1267 | A    | 29   | 4    | 66        | 68      | 301.87         | 62.56                 | 0.5121470                            | -9.58                           | <b>-9.00</b>                    | 0.26                   |
| 85                        | K                | 1267 | B    | 30   | 7    | 43        | 45      | 306.84         | 63.45                 | 0.5121989                            | -8.57                           | <b>-7.98</b>                    | 0.26                   |
| 74                        | K                | 1267 | A    | 30   | 4    | 70        | 72      | 311.76         | 64.50                 | 0.5121065                            | -10.37                          | <b>-9.77</b>                    | 0.41                   |
| 69                        | K                | 1267 | B    | 32   | 1    | 125       | 127     | 316.61         | 65.46                 | 0.5121669                            | -9.19                           | <b>-8.58</b>                    | 0.41                   |
| 95                        | K                | 1267 | B    | 32   | 3    | 48        | 50      | 318.84         | 65.79                 | 0.5121637                            | -9.25                           | <b>-8.64</b>                    | 0.26                   |
| 80                        | K                | 1267 | B    | 32   | 5    | 65        | 67      | 321.61         | 66.04                 | 0.5121628                            | -9.27                           | <b>-8.66</b>                    | 0.26                   |
| 79                        | K                | 1267 | A    | 31   | 7    | 121       | 123     | 326.65         | 66.38                 | 0.5121709                            | -9.11                           | <b>-8.50</b>                    | 0.26                   |
| 96                        | K                | 1267 | B    | 33   | 4    | 104       | 106     | 331.55         | 66.72                 | 0.5122319                            | -7.92                           | <b>-7.30</b>                    | 0.26                   |
| 93                        | K                | 1267 | B    | 34   | 1    | 76        | 78      | 336.57         | 67.06                 | 0.5122705                            | -7.17                           | <b>-6.55</b>                    | 0.26                   |
| 73                        | K                | 1267 | B    | 34   | 4    | 122       | 124     | 341.53         | 67.39                 | 0.5121906                            | -8.73                           | <b>-8.10</b>                    | 0.41                   |
| 86                        | K                | 1267 | B    | 35   | 1    | 70        | 72      | 346.66         | 67.74                 | 0.5121759                            | -9.01                           | <b>-8.39</b>                    | 0.26                   |
| 92                        | K                | 1267 | B    | 35   | 4    | 128       | 130     | 351.74         | 68.09                 | 0.5122110                            | -8.33                           | <b>-7.70</b>                    | 0.26                   |
| 83                        | K                | 1267 | B    | 36   | 1    | 2         | 4       | 356.93         | 68.44                 | 0.5121910                            | -8.72                           | <b>-8.09</b>                    | 0.26                   |
| 78                        | K                | 1267 | B    | 36   | 4    | 48        | 50      | 361.89         | 68.78                 | 0.5122140                            | -8.27                           | <b>-7.63</b>                    | 0.41                   |
| 76                        | K                | 1267 | B    | 36   | 7    | 34        | 36      | 366.25         | 69.07                 | 0.5122616                            | -7.34                           | <b>-6.70</b>                    | 0.41                   |
| <i>detrital fractions</i> |                  |      |      |      |      |           |         |                |                       |                                      |                                 |                                 |                        |
| 131TD                     | K                | 1267 | A    | 23   | 3    | 85        | 87      | 237.36         | 56.42                 | 0.5121827                            | -8.88                           | <b>-8.36</b>                    | 0.18                   |
| 129TD                     | K                | 1267 | A    | 25   | 4    | 6         | 8       | 262.17         | 57.94                 | 0.5122021                            | -8.50                           | <b>-7.97</b>                    | 0.18                   |
| 128TD                     | K                | 1267 | B    | 28   | 6    | 37        | 39      | 286.98         | 60.51                 | 0.5122091                            | -8.37                           | <b>-7.81</b>                    | 0.18                   |
| 126TD                     | K                | 1267 | A    | 30   | 4    | 70        | 72      | 311.76         | 64.50                 | 0.5122047                            | -8.45                           | <b>-7.86</b>                    | 0.18                   |
| 130TD                     | K                | 1267 | B    | 34   | 1    | 76        | 78      | 336.57         | 67.06                 | 0.5120998                            | -10.50                          | <b>-9.88</b>                    | 0.18                   |
| 127TD                     | K                | 1267 | B    | 36   | 4    | 48        | 50      | 361.89         | 68.78                 | 0.5120398                            | -11.67                          | <b>-11.03</b>                   | 0.18                   |

<sup>a-f</sup> Footnotes as for Table 2.

**Supplementary Table 5. Nd isotope results for Site 369**

| Sample ID <sup>a</sup>    | Lab <sup>b</sup> | Site | Hole | Core | Sec. | from (cm) | to (cm) | Depth (CCSF-A) | Age (Ma) <sup>c</sup> | <sup>143</sup> Nd/ <sup>144</sup> Nd | $\epsilon_{Nd(0)}$ <sup>d</sup> | $\epsilon_{Nd(t)}$ <sup>e</sup> | $2\sigma$ <sup>f</sup> |
|---------------------------|------------------|------|------|------|------|-----------|---------|----------------|-----------------------|--------------------------------------|---------------------------------|---------------------------------|------------------------|
| <i>leachates</i>          |                  |      |      |      |      |           |         |                |                       |                                      |                                 |                                 |                        |
| 98                        | K                | 369  | A    | 36   | 1    | 49        | 51      | 374.99         | 68.39                 | 0.5119294                            | -13.82                          | <b>-13.19</b>                   | 0.42                   |
| 100                       | K                | 369  | A    | 36   | 3    | 101       | 103     | 378.51         | 70.13                 | 0.5119718                            | -13.00                          | <b>-12.35</b>                   | 0.42                   |
| 103                       | K                | 369  | A    | 36   | 5    | 119       | 121     | 381.69         | 71.64                 | 0.5120641                            | -11.19                          | <b>-10.53</b>                   | 0.42                   |
| 101                       | K                | 369  | A    | 37   | 1    | 97        | 99      | 384.97         | 72.28                 | 0.5119107                            | -14.19                          | <b>-13.52</b>                   | 0.26                   |
| 101b                      | O                | 369  | A    | 37   | 1    | 97        | 99      | 384.97         | 72.28                 | 0.5119545                            | -13.33                          | <b>-12.67</b>                   | 0.20                   |
| 105                       | O                | 369  | A    | 37   | 3    | 78        | 80      | 387.78         | 72.83                 | 0.5118726                            | -14.93                          | <b>-14.26</b>                   | 0.31                   |
| 105b                      | O                | 369  | A    | 37   | 3    | 78        | 80      | 387.78         | 72.83                 | 0.5118352                            | -15.66                          | <b>-14.99</b>                   | 0.20                   |
| <i>detrital fractions</i> |                  |      |      |      |      |           |         |                |                       |                                      |                                 |                                 |                        |
| 132TD                     | K                | 369  | A    | 36   | 3    | 101       | 103     | 378.51         | 70.13                 | 0.5118415                            | -15.54                          | <b>-14.89</b>                   | 0.18                   |
| 134TD                     | K                | 369  | A    | 37   | 3    | 78        | 80      | 387.78         | 72.83                 | 0.5117438                            | -17.44                          | <b>-16.77</b>                   | 0.18                   |
| 134TDb                    | O                | 369  | A    | 37   | 3    | 78        | 80      | 387.78         | 72.83                 | 0.5117683                            | -16.97                          | <b>-16.29</b>                   | 0.20                   |

<sup>a-f</sup> Footnotes as for Table 2.

**Supplementary Table 6. Nd isotope results for Site U1403**

| Sample ID <sup>a</sup>    | Lab <sup>b</sup> | Site | Hole | Core | Sec. | from (cm) | to (cm) | Depth (rCCSF) | Age (Ma) <sup>c</sup> | <sup>143</sup> Nd/ <sup>144</sup> Nd | $\epsilon_{Nd(0)}$ <sup>d</sup> | $\epsilon_{Nd(t)}$ <sup>e</sup> | $2\sigma$ <sup>f</sup> |
|---------------------------|------------------|------|------|------|------|-----------|---------|---------------|-----------------------|--------------------------------------|---------------------------------|---------------------------------|------------------------|
| <i>leachates</i>          |                  |      |      |      |      |           |         |               |                       |                                      |                                 |                                 |                        |
| 34                        | K                | 1403 | A    | 22   | 1    | 118       | 120     | 211.17        | 58.38                 | 0.51220316                           | -8.48                           | <b>-7.94</b>                    | 0.28                   |
| 41                        | K                | 1403 | B    | 25   | 3    | 32        | 34      | 214.92        | 59.27                 | 0.51219441                           | -8.65                           | <b>-8.1</b>                     | 0.28                   |
| 39                        | K                | 1403 | B    | 25   | 5    | 110       | 112     | 218.7         | 60.16                 | 0.5121726                            | -9.08                           | <b>-8.52</b>                    | 0.28                   |
| 26                        | K                | 1403 | A    | 23   | 4    | 130       | 132     | 222.04        | 60.95                 | 0.51211773                           | -10.15                          | <b>-9.58</b>                    | 0.28                   |
| 36                        | K                | 1403 | B    | 26   | 3    | 17        | 19      | 225.83        | 61.85                 | 0.51206354                           | -11.21                          | <b>-10.63</b>                   | 0.28                   |
| 38                        | K                | 1403 | A    | 25   | 1    | 88        | 90      | 233.61        | 63.50                 | 0.51207215                           | -11.04                          | <b>-10.45</b>                   | 0.28                   |
| 61                        | K                | 1403 | A    | 25   | 3    | 14        | 16      | 235.87        | 63.96                 | 0.51214574                           | -9.6                            | <b>-9.01</b>                    | 0.41                   |
| 45                        | K                | 1403 | A    | 25   | 6    | 3         | 5       | 240.26        | 64.84                 | 0.51212113                           | -10.08                          | <b>-9.48</b>                    | 0.28                   |
| 29                        | K                | 1403 | A    | 26   | 1    | 18        | 20      | 241.77        | 65.00                 | 0.51208917                           | -10.71                          | <b>-10.1</b>                    | 0.41                   |
| 46                        | K                | 1403 | A    | 26   | 4    | 8         | 10      | 246.17        | 65.49                 | 0.51209801                           | -10.53                          | <b>-9.93</b>                    | 0.28                   |
| 46b                       | O                | 1403 | A    | 26   | 4    | 8         | 10      | 246.17        | 65.49                 | 0.51209984                           | -10.5                           | <b>-9.89</b>                    | 0.20                   |
| 64                        | K                | 1403 | A    | 26   | 4    | 68        | 70      | 246.77        | 65.71                 | 0.51209701                           | -10.55                          | <b>-9.95</b>                    | 0.41                   |
| 47                        | K                | 1403 | B    | 28   | 1    | 15        | 16.5    | 247.16        | 65.85                 | 0.51211903                           | -10.12                          | <b>-9.51</b>                    | 0.28                   |
| 63                        | K                | 1403 | B    | 28   | 1    | 30        | 32      | 247.31        | 65.90                 | 0.51210475                           | -10.4                           | <b>-9.79</b>                    | 0.41                   |
| 48                        | K                | 1403 | B    | 28   | 1    | 45        | 46.5    | 247.46        | 65.96                 | 0.51214753                           | -9.57                           | <b>-8.96</b>                    | 0.28                   |
| 48b                       | O                | 1403 | B    | 28   | 1    | 45        | 46.5    | 247.46        | 65.96                 | 0.51214445                           | -9.63                           | <b>-9.02</b>                    | 0.20                   |
| 68                        | K                | 1403 | B    | 28   | 1    | 60        | 62      | 247.601       | 66.01                 | 0.51210539                           | -10.39                          | <b>-9.78</b>                    | 0.41                   |
| 49                        | K                | 1403 | B    | 28   | 1    | 75        | 76.5    | 247.76        | 66.05                 | 0.51208094                           | -10.87                          | <b>-10.26</b>                   | 0.28                   |
| 30                        | O                | 1403 | B    | 28   | 1    | 95        | 96.5    | 247.96        | 66.07                 | 0.51214083                           | -9.7                            | <b>-9.09</b>                    | 0.13                   |
| 60                        | K                | 1403 | B    | 28   | 1    | 115       | 117     | 248.16        | 66.09                 | 0.51214344                           | -9.65                           | <b>-9.04</b>                    | 0.41                   |
| 65                        | K                | 1403 | B    | 28   | 2    | 6         | 8       | 248.57        | 66.13                 | 0.51211151                           | -10.27                          | <b>-9.66</b>                    | 0.41                   |
| 50                        | K                | 1403 | B    | 28   | 2    | 46.5      | 48      | 248.97        | 66.17                 | 0.51216274                           | -9.27                           | <b>-8.66</b>                    | 0.28                   |
| 50b                       | O                | 1403 | B    | 28   | 2    | 46.5      | 48      | 248.97        | 66.17                 | 0.51214194                           | -9.68                           | <b>-9.06</b>                    | 0.20                   |
| 35                        | K                | 1403 | A    | 27   | 2    | 30        | 32      | 253.95        | 66.68                 | 0.51211607                           | -10.18                          | <b>-9.56</b>                    | 0.28                   |
| 32                        | K                | 1403 | A    | 27   | 3    | 100       | 102     | 256.15        | 66.90                 | 0.51210387                           | -10.42                          | <b>-9.8</b>                     | 0.41                   |
| 51                        | K                | 1403 | A    | 27   | 5    | 90        | 92      | 259.05        | 67.18                 | 0.51208445                           | -10.8                           | <b>-10.18</b>                   | 0.28                   |
| 37                        | K                | 1403 | B    | 29   | 3    | 130       | 132     | 263.28        | 67.58                 | 0.51209507                           | -10.59                          | <b>-9.97</b>                    | 0.28                   |
| 52                        | K                | 1403 | A    | 28   | 4    | 30        | 32      | 267.75        | 67.92                 | 0.51212524                           | -10                             | <b>-9.37</b>                    | 0.28                   |
| 52b                       | O                | 1403 | A    | 28   | 4    | 30        | 32      | 267.75        | 67.92                 | 0.51213415                           | -9.83                           | <b>-9.2</b>                     | 0.20                   |
| 27                        | K                | 1403 | B    | 30   | 2    | 60        | 62      | 271.25        | 68.33                 | 0.51213766                           | -9.76                           | <b>-9.13</b>                    | 0.28                   |
| 67                        | K                | 1403 | B    | 31   | 1    | 1         | 3       | 279.83        | 69.83                 | 0.51213027                           | -9.9                            | <b>-9.26</b>                    | 0.41                   |
| 42                        | K                | 1403 | B    | 31   | 3    | 100       | 102     | 283.82        | 70.63                 | 0.51217083                           | -9.11                           | <b>-8.46</b>                    | 0.28                   |
| 44                        | K                | 1403 | B    | 32   | 1    | 3         | 5       | 290.52        | 71.97                 | 0.51220812                           | -8.39                           | <b>-7.72</b>                    | 0.28                   |
| 44b                       | O                | 1403 | B    | 32   | 1    | 3         | 5       | 290.52        | 71.97                 | 0.51222027                           | -8.15                           | <b>-7.48</b>                    | 0.20                   |
| 62                        | K                | 1403 | B    | 32   | 3    | 30        | 32      | 293.79        | 72.63                 | 0.51214667                           | -9.58                           | <b>-8.91</b>                    | 0.41                   |
| 40                        | K                | 1403 | B    | 32   | 5    | 40        | 42      | 296.59        | 73.19                 | 0.51220583                           | -8.43                           | <b>-7.75</b>                    | 0.28                   |
| <i>detrital fractions</i> |                  |      |      |      |      |           |         |               |                       |                                      |                                 |                                 |                        |
| 54TD                      | K                | 1403 | B    | 25   | 3    | 32        | 34      | 214.92        | 59.27                 | 0.51211421                           | -10.22                          | <b>-9.67</b>                    | 0.18                   |
| 53TD                      | K                | 1403 | A    | 25   | 1    | 88        | 90      | 233.61        | 63.50                 | 0.51197308                           | -12.97                          | <b>-12.38</b>                   | 0.18                   |
| 123TD                     | K                | 1403 | A    | 26   | 1    | 18        | 20      | 241.77        | 65.00                 | 0.5120373                            | -11.72                          | <b>-11.12</b>                   | 0.18                   |
| 56TD                      | K                | 1403 | A    | 26   | 4    | 8         | 10      | 246.17        | 65.49                 | 0.51200563                           | -12.34                          | <b>-11.73</b>                   | 0.18                   |
| 124TD                     | K                | 1403 | A    | 28   | 4    | 30        | 32      | 267.75        | 67.92                 | 0.51205968                           | -11.28                          | <b>-10.65</b>                   | 0.18                   |
| 125TD                     | K                | 1403 | B    | 31   | 1    | 1         | 3       | 279.83        | 69.83                 | 0.51204884                           | -11.49                          | <b>-10.85</b>                   | 0.18                   |
| 55TD                      | K                | 1403 | B    | 32   | 1    | 3         | 5       | 290.52        | 71.97                 | 0.51211144                           | -10.27                          | <b>-9.61</b>                    | 0.18                   |

<sup>a-f</sup> Footnotes as for Table 2.

**Supplementary Table 7.** Tie-points used for the construction of age-models

| Site 516<br>Stratigraphic event <sup>a</sup> | Depth<br>(mcd) | Age<br>(Ma) |
|----------------------------------------------|----------------|-------------|
| base C24n3n                                  | 888.10         | 53.983      |
| base NP10                                    | 898.50         | 55.860      |
| base NP9                                     | 913.80         | 57.210      |
| base C25N                                    | 916.72         | 57.656      |
| base NP8                                     | 920.10         | 58.700      |
| base NP7                                     | 929.10         | 58.970      |
| base NP6                                     | 936.60         | 59.540      |
| base NP5                                     | 943.30         | 61.510      |
| base NP4                                     | 946.10         | 63.250      |
| base NP3                                     | 962.10         | 64.810      |
| base NP2                                     | 963.10         | 65.470      |
| K/Pg boundary                                | 964.11         | 66.040      |
| base C29r                                    | 971.42         | 66.398      |
| base C31n                                    | 1011.15        | 69.269      |
| base C31r                                    | 1032.03        | 71.449      |
| base C32r                                    | 1071.88        | 74.309      |

| Site 525<br>Stratigraphic event <sup>a</sup>               | Depth<br>(rmcd) | Age<br>(Ma) |
|------------------------------------------------------------|-----------------|-------------|
| base NP10                                                  | 371.30          | 55.860      |
| base NP9                                                   | 409.40          | 57.210      |
| base NP8                                                   | 415.90          | 58.700      |
| base NP7                                                   | 416.70          | 58.970      |
| base NP6                                                   | 423.50          | 59.540      |
| base NP5                                                   | 433.00          | 61.510      |
| base NP4                                                   | 442.38          | 63.250      |
| base NP3                                                   | 446.80          | 64.810      |
| base NP2                                                   | 449.30          | 65.470      |
| K/Pg boundary                                              | 451.71          | 66.040      |
| base C29r                                                  | 456.69          | 66.389      |
| base C30n                                                  | 475.15          | 68.196      |
| base C30r                                                  | 476.40          | 68.369      |
| base C31n                                                  | 489.35          | 69.269      |
| base C31r                                                  | 519.95          | 71.449      |
| base C32n1n                                                | 522.61          | 71.689      |
| base C32n1r                                                | 526.24          | 71.939      |
| C32n2n, estimate<br>(base C32n2n, age 73.649, below 565 m) | 565.00          | 73.600      |

| Site 1267<br>Stratigraphic event <sup>a</sup> | Depth<br>(rmcd) | Age<br>(Ma) |
|-----------------------------------------------|-----------------|-------------|
| astrochronology                               | 232.05          | 56.042      |
| astrochronology                               | 232.63          | 56.105      |
| astrochronology                               | 232.85          | 56.126      |
| astrochronology                               | 233.10          | 56.147      |
| astrochronology                               | 233.65          | 56.189      |
| astrochronology                               | 233.88          | 56.21       |
| astrochronology                               | 235.40          | 56.315      |
| astrochronology                               | 236.95          | 56.399      |
| astrochronology                               | 237.43          | 56.42       |

|                 |        |        |
|-----------------|--------|--------|
| astrochronology | 237.80 | 56.441 |
| astrochronology | 239.20 | 56.504 |
| astrochronology | 239.55 | 56.525 |
| astrochronology | 240.30 | 56.567 |
| astrochronology | 240.68 | 56.588 |
| astrochronology | 241.05 | 56.609 |
| astrochronology | 241.43 | 56.630 |
| astrochronology | 242.33 | 56.693 |
| astrochronology | 243.05 | 56.735 |
| astrochronology | 243.43 | 56.756 |
| astrochronology | 244.08 | 56.819 |
| astrochronology | 245.08 | 56.882 |
| astrochronology | 245.40 | 56.903 |
| astrochronology | 245.75 | 56.924 |
| astrochronology | 246.85 | 56.987 |
| astrochronology | 247.25 | 57.008 |
| astrochronology | 247.53 | 57.029 |
| astrochronology | 248.40 | 57.113 |
| astrochronology | 249.13 | 57.176 |
| astrochronology | 249.53 | 57.197 |
| astrochronology | 249.83 | 57.218 |
| astrochronology | 251.43 | 57.302 |
| astrochronology | 251.70 | 57.323 |
| astrochronology | 253.46 | 57.386 |
| astrochronology | 253.74 | 57.407 |
| astrochronology | 256.14 | 57.575 |
| astrochronology | 256.49 | 57.596 |
| astrochronology | 257.61 | 57.659 |
| astrochronology | 257.99 | 57.680 |
| astrochronology | 258.34 | 57.701 |
| astrochronology | 259.11 | 57.743 |
| astrochronology | 259.43 | 57.764 |
| astrochronology | 259.80 | 57.785 |
| astrochronology | 260.13 | 57.806 |
| astrochronology | 260.45 | 57.827 |
| astrochronology | 261.35 | 57.890 |
| astrochronology | 261.61 | 57.911 |
| astrochronology | 263.43 | 58.016 |
| astrochronology | 263.88 | 58.037 |
| astrochronology | 264.33 | 58.058 |
| astrochronology | 265.50 | 58.121 |
| astrochronology | 265.83 | 58.142 |
| astrochronology | 266.15 | 58.163 |
| astrochronology | 266.45 | 58.184 |
| astrochronology | 266.75 | 58.205 |
| base C25r       | 275.48 | 58.959 |
| base C26n       | 277.40 | 59.237 |
| base C26r       | 299.90 | 62.221 |
| base C27n       | 301.65 | 62.517 |
| base C27r       | 307.08 | 63.494 |
| base C28n       | 312.53 | 64.667 |
| base C28r       | 313.75 | 64.958 |
| base C29n       | 317.92 | 65.688 |
| K/Pg boundary   | 320.25 | 66.040 |



|              |        |        |
|--------------|--------|--------|
| base C29r    | 326.88 | 66.389 |
| extrapolated | 366.30 | 69.076 |

| Site 369<br>Stratigraphic event <sup>a</sup> | Depth<br>(mbsf) | Age<br>(Ma) |
|----------------------------------------------|-----------------|-------------|
| extrapolated                                 | 372.00          | 66.916      |
| base C31n                                    | 376.00          | 69.269      |
| base <i>Micula mura</i> zone                 | 377.00          | 69.000      |
| average of two events above                  | 376.50          | 69.135      |
| base C31r                                    | 379.00          | 71.449      |
| top <i>Globotruncana gansseri</i> zone       | 384.00          | 71.750      |
| average of two events above                  | 381.50          | 71.600      |
| top <i>Eiffellithus eximius</i> zone         | 412.00          | 75.950      |
| Top <i>Globotruncana elevata</i> zone        | 412.00          | 79.200      |
| average of two events above                  | 412.00          | 77.575      |

| Site U1403<br>Stratigraphic event <sup>a</sup>                  | Depth<br>(rCCSF) | Age<br>(Ma) |
|-----------------------------------------------------------------|------------------|-------------|
| base NP 10, FO <i>Rhomboaster bramlettei</i>                    | 195.75           | 55.860      |
| P-E boundary, FO <i>Rhomboaster</i> spp.                        | 200.98           | 55.960      |
| base <i>Lithoptychius</i> spp., 1 <sup>st</sup> radiation fasc. | 227.00           | 62.200      |
| base NP3, FO <i>Chiasmolithus danicus</i>                       | 239.98           | 64.810      |
| base NP2, FO <i>Cruciplacolithus intermedius</i>                | 246.12           | 65.470      |
| K/Pg boundary                                                   | 247.69           | 66.040      |
| astrochronology                                                 | 251.04           | 66.374      |
| astrochronology                                                 | 254.96           | 66.782      |
| astrochronology                                                 | 259.21           | 67.192      |
| astrochronology                                                 | 263.37           | 67.585      |
| astrochronology                                                 | 268.68           | 67.986      |
| astrochronology                                                 | 271.64           | 68.383      |
| astrochronology                                                 | 274.64           | 68.787      |
| astrochronology                                                 | 275.00           | 68.860      |
| extrapolated                                                    | 300.00           | 73.870      |

<sup>a</sup>) "C" followed by a number: magnetochron, "NP" followed by a number: nannoplankton zone<sup>14</sup>, LO: Last Occurrence, FO: First occurrence. In case of contradicting ages for stratigraphic events for Site 369, average depths and ages were used as tie-points.

## References

1. Barker, P.F., Carlson, R.L. & Johnson, D.A. Init. Rep. Deep Sea Drill. Proj. 72 (1983).
2. Berggren, W.A. *et al.* Magnetobiostratigraphy of Deep Sea Drilling Project Leg 72, Sites 515-518, Rio Grande Rise (South Atlantic). In: Barker, P.F. *et al.*, Init. Rep. Deep Sea Drill. Proj. 72, 938–948 (1983).
3. Gradstein, F., Ogg, J., Schmitz, M., Ogg, G. (Eds.) *The Geologic Time Scale 2012*. (Elsevier, 2012).
4. Moore, T.C., Rabinowitz, P.D. *et al.*, Init. Rep. Deep Sea Drill. Proj. 74 (1984).
5. Li, L. & Keller, G. Abrupt deep-sea warming at the end of the Cretaceous. *Geology* **26**, 995–998 (1998).
6. Chave, A.D. Lower Paleocene-Upper Cretaceous magnetostratigraphy, Sites 525, 527, 528, and 529, Deep Sea Drilling Project Leg 74, in: Moore, T.C. *et al.*, Init. Rep. Deep Sea Drill. Proj. 74, 525–531 (1984).
7. Via, R. K. & Thomas, D. J. Evolution of Atlantic thermohaline circulation: Early Oligocene onset of deep-water production in the North Atlantic. *Geology* **34**, 441–444 (2006).
8. Zachos, J.C. *et al.* Leg 208 summary. Proceed. Ocean Drill. Progr., Init. Rep. 208, 1–112 (2004).
9. Westerhold, T. *et al.* On the duration of magnetostratigraphic units C24r and C25n and the timing of early Eocene global warming events: Implications from the Ocean Drilling Program Leg 208 Walvis Ridge depth transect. *Paleoceanography* **22**, PA2201 (2007).
10. Lancelot, Y., Seibold, E. *et al.* Init. Rep. Deep Sea Drill. Proj. 41 (1978).
11. Expedition 342 Scientists, IODP Prel. Rept. 342 (2012)
12. Norris, R.D., Wilson, P.A., Blum, P., & Expedition 342 Scientists Site 1403. Proceed. Integrat. Ocean Drill. Progr. 342 (2014).
13. Batenburg, S.J. *et al.* Late Maastrichtian carbon isotope stratigraphy and cyclostratigraphy of the Newfoundland Margin (Site U1403, IODP Leg 342). *Newsl. Stratigr.* 10.1127 (2017).
14. Martini, E., Standard Palaeogene calcareous nannoplankton zonation. *Nature* **226**, 560–561 (1970).
